# Supplementary material
Source: publisher figshare collection journal article supplement (https://frontiersin.figshare.com/ndownloader/files/12945380)
Supplement: Supplementary file 1 [file 12945380]

## 8 Appendix

### 8.1 Key relevant results from [4]

In order to make this manuscript self containing we include in this section key relevant lemmas, corollaries and definitions from [4].

**Lemma 8.1** (Lemma 2.5, [4]). *Let  $S$  be an index set of cardinality  $s$ . For any level  $j$  of the dyadic splitting,  $j = 0, \dots, \lceil \log_2 s \rceil - 1$ , the set  $S$  is decomposed into disjoint sets each having cardinality  $Q_j = \lceil \frac{s}{2^j} \rceil$  or  $R_j = Q_j - 1$ . Let  $q_j$  sets have cardinality  $Q_j$  and  $r_j$  sets have cardinality  $R_j$ , then*

$$q_j = s - 2^j \cdot \left\lceil \frac{s}{2^j} \right\rceil + 2^j, \quad \text{and} \quad r_j = 2^j - q_j. \quad (132)$$

**Lemma 8.2** (Lemma 2.3, [4]). *Let  $B, B_1, B_2 \subset [n]$  where  $|B_1| = b_1, |B_2| = b_2, B = B_1 \cup B_2$  and  $|B| = b$ . Also let  $B_1$  and  $B_2$  be drawn uniformly at random, independent of each other, and define  $P_n(b, b_1, b_2) := \text{Prob}(|B_1 \cap B_2| = b_1 + b_2 - b)$ , then*

$$P_n(b, b_1, b_2) = \binom{b_1}{b_1 + b_2 - b} \binom{n - b_1}{b - b_1} \binom{n}{b_2}^{-1}. \quad (133)$$

**Definition 8.1.**  $P_n(x, y, z)$  defined in (133) satisfies the upper bound

$$P_n(x, y, z) \leq \pi(x, y, z) \exp(\psi_n(x, y, z)) \quad (134)$$

with bounds of  $\pi(x, y, z)$  given in Lemma 8.3.

**Lemma 8.3.** *For  $\pi(x, y, z)$  and  $P_n(x, y, z)$  given by (134) and (133) respectively, if  $\{y, z\} < x < y + z$ ,  $\pi(x, y, z)$  is given by*

$$\left(\frac{5}{4}\right)^4 \left[ \frac{yz(n-y)(n-z)}{2\pi n(y+z-x)(x-y)(x-z)(n-x)} \right]^{\frac{1}{2}}, \quad (135)$$

otherwise  $\pi(x, y, z)$  has the following cases.

$$\left(\frac{5}{4}\right)^3 \left[ \frac{y(n-z)}{n(y-z)} \right]^{\frac{1}{2}} \quad \text{if } x = y > z; \quad (136)$$

$$\left(\frac{5}{4}\right)^3 \left[ \frac{(n-y)(n-z)}{n(n-y-z)} \right]^{\frac{1}{2}} \quad \text{if } x = y + z; \quad (137)$$

$$\left(\frac{5}{4}\right)^2 \left[ \frac{2\pi z(n-z)}{n} \right]^{\frac{1}{2}} \quad \text{if } x = y = z. \quad (138)$$

**Lemma 8.4.** *Define*

$$\psi_n(x, y, z) := y \cdot H\left(\frac{x-z}{y}\right) + (n-y) \cdot H\left(\frac{x-y}{n-y}\right) - n \cdot H\left(\frac{z}{n}\right), \quad (139)$$

then for  $n > x > y$  we have that

$$\text{for } y > z \quad \psi_n(x, y, y) \leq \psi_n(x, y, z) \leq \psi_n(x, z, z); \quad (140)$$

$$\text{for } x > z \quad \psi_n(x, y, y) > \psi_n(z, y, y); \quad (141)$$

$$\text{for } 1/2 < \alpha \leq 1 \quad \psi_n(x, y, y) < \psi_n(\alpha x, \alpha y, \alpha y). \quad (142)$$

**Corollary 8.1.** *If  $n > 2y$ , then  $\pi(y, y, y)$  is monotonically increasing in  $y$ .*

The following bound, used in [4], is deducible from an asymptotic series for the logarithms Stirling approximation of the factorial (!)

$$\frac{16e^{N\mathcal{H}(p)}}{25\sqrt{2\pi p(1-p)N}} \leq \binom{N}{pN} \leq \frac{5e^{N\mathcal{H}(p)}}{4\sqrt{2\pi p(1-p)N}}. \quad (143)$$

## 8.2 Derivation of Inequalities

### 8.2.1 Inequality 64

By Lemma 8.1, the left hand side (LHS) of (64) is equal to the following.

$$\begin{aligned} q_0 (q_1 r_1) \cdot (q_2 r_2) \cdot (q_3 r_3) \cdots (q_{\lceil \log_2 s \rceil - 2} r_{\lceil \log_2 s \rceil - 2}) &= \left(s - \left\lceil \frac{s}{1} \right\rceil + 1\right) \cdot \left(s - 2 \cdot \left\lceil \frac{s}{2} \right\rceil + 2\right) \\ &\times \left(2 - \left(s - 2 \cdot \left\lceil \frac{s}{2} \right\rceil + 2\right)\right) \times \cdots \times \left(s - 2^{\lceil \log_2 s \rceil - 2} \cdot \left\lceil \frac{s}{2^{\lceil \log_2 s \rceil - 2}} \right\rceil + 2^{\lceil \log_2 s \rceil - 2}\right) \\ &\times \left(2^{\lceil \log_2 s \rceil - 2} - \left(s - 2^{\lceil \log_2 s \rceil - 2} \cdot \left\lceil \frac{s}{2^{\lceil \log_2 s \rceil - 2}} \right\rceil + 2^{\lceil \log_2 s \rceil - 2}\right)\right). \end{aligned} \quad (144)$$

We simplify (144) to get the following.

$$\begin{aligned} 1 \cdot \left(s - 2 \cdot \left\lceil \frac{s}{2} \right\rceil + 2\right) \cdot \left(2 \cdot \left\lceil \frac{s}{2} \right\rceil - s\right) \cdot \left(s - 2^2 \cdot \left\lceil \frac{s}{2^2} \right\rceil + 2^2\right) \cdot \left(2^2 \cdot \left\lceil \frac{s}{2^2} \right\rceil - s\right) \times \\ \cdots \times \left(s - 2^{\lceil \log_2 s \rceil - 2} \cdot \left\lceil \frac{s}{2^{\lceil \log_2 s \rceil - 2}} \right\rceil + 2^{\lceil \log_2 s \rceil - 2}\right) \cdot \left(2^{\lceil \log_2 s \rceil - 2} \cdot \left\lceil \frac{s}{2^{\lceil \log_2 s \rceil - 2}} \right\rceil - s\right). \end{aligned} \quad (145)$$

We upper bound  $-\lceil z \rceil$  by  $-z$  and  $\lceil z \rceil$  by  $z + 1$  to upper bound (145) as follows.

$$\begin{aligned} \left(s - 2 \cdot \frac{s}{2} + 2\right) \cdot \left(2 \left(\frac{s}{2} + 1\right) - s\right) \cdot \left(s - 4 \cdot \frac{s}{4} + 2\right) \cdot \left(4 \left(\frac{s}{4} + 1\right) - s\right) \times \\ \cdots \times \left(s - 2^{\lceil \log_2 s \rceil - 2} \cdot \frac{s}{2^{\lceil \log_2 s \rceil - 2}} + 2^{\lceil \log_2 s \rceil - 2}\right) \cdot \left(2^{\lceil \log_2 s \rceil - 2} \cdot \frac{s}{2^{\lceil \log_2 s \rceil - 2}} - s\right). \end{aligned} \quad (146)$$

The bound (146) is then simplified to the following.

$$(2 \cdot 2) \cdot (4 \cdot 4) \cdot (8 \cdot 8) \times \cdots \times \left(2^{\lceil \log_2 s \rceil - 2} \cdot 2^{\lceil \log_2 s \rceil - 2}\right) = 2^2 \cdot 4^2 \cdot 8^2 \times \cdots \times 2^{2^{\lceil \log_2 s \rceil - 4}} \quad (147)$$

$$= 4^1 \cdot 4^2 \cdot 4^3 \cdots \times 4^{\lceil \log_2 s \rceil - 2} \quad (148)$$

$$\leq 4^{\left(\sum_{i=1}^{\log_2 s - 1} i\right)} \quad (149)$$

$$= 4^{\frac{1}{2}(\log_2 s - 1) \cdot \log_2 s} = 2^{(\log_2 s - 1) \cdot \log_2 s}. \quad (150)$$

In (149) we upper bound  $\lceil \log_2 s \rceil$  by  $\log_2 s + 1$ ; while in the LHS of (150) we computed the summation of a finite arithmetic series. After some algebraic manipulations of logarithms we end up with the RHS of (150), which simplifies to (64).

### 8.2.2 Inequality 65

Again by Lemma 8.1, the left hand side (LHS) of (65), i.e.  $(a_{Q_0} a_{Q_1} a_{R_1} a_{Q_2} a_{R_2} a_{Q_3} a_{R_3} \cdots a_3 a_2)^{1/2}$  is equal to the following.

$$\left(a_{\lceil \frac{s}{2^0} \rceil} a_{\lceil \frac{s}{2^1} \rceil} a_{\lceil \frac{s}{2^1} \rceil - 1} a_{\lceil \frac{s}{2^2} \rceil} a_{\lceil \frac{s}{2^2} \rceil - 1} a_{\lceil \frac{s}{2^3} \rceil} a_{\lceil \frac{s}{2^3} \rceil - 1} \times \cdots \times a_{\lceil \frac{s}{2^{\lceil \log_2 s \rceil - 2}} \rceil} a_{\lceil \frac{s}{2^{\lceil \log_2 s \rceil - 2}} \rceil - 1}\right)^{1/2}. \quad (151)$$

Given the monotonicity of  $a_{(\cdot)}$  in terms of its subscripts, which indicate cardinalities of sets. Due to the nestedness of the sets due to the dyadic splitting, we upper bound  $a_{\lceil \frac{s}{2^j} \rceil - 1}$  by  $a_{\frac{s}{2^j}}$ , and  $a_{\lceil \frac{s}{2^j} \rceil}$  by  $a_{\frac{s}{2^j} + 1}$ , resulting in the following upper bound for (151).

$$\left[ a_s a_{\left(\frac{s}{2}+1\right)} a_{\frac{s}{2}} a_{\left(\frac{s}{4}+1\right)} a_{\frac{s}{4}} a_{\left(\frac{s}{8}+1\right)} a_{\frac{s}{8}} \times \cdots \times a_{\left(\frac{s}{2^{\lceil \log_2 s \rceil - 2}} + 1\right)} a_{\frac{s}{2^{\lceil \log_2 s \rceil - 2}}} \right]^{1/2} \quad (152)$$

$$\leq \left[ a_s a_{\left(\frac{s}{2}+1\right)} a_{\frac{s}{2}} a_{\left(\frac{s}{4}+1\right)} a_{\frac{s}{4}} a_{\left(\frac{s}{8}+1\right)} a_{\frac{s}{8}} \times \cdots \times a_{\left(\frac{s}{2^{\log_2 s - 2}} + 1\right)} a_{\frac{s}{2^{\log_2 s - 2}}} \right]^{1/2}. \quad (153)$$

In (153) we used the fact that  $2^{\log_2 s - 2}$  is a lower bound to  $2^{\lceil \log_2 s \rceil - 2}$ . We fix  $a_s = (1 - \epsilon)ds =: cs$  and we require expansion to hold for all  $|\mathcal{S}| \leq s$ , i.e.  $a_{s'} = cs'$  for all  $s' \leq s$ . Thus we can re-write (153) as follows.

$$\left[ a_s \left( \frac{cs}{2} + c \right) \frac{cs}{2} \left( \frac{cs}{4} + c \right) \frac{cs}{4} \left( \frac{cs}{8} + c \right) \frac{cs}{8} \times \cdots \times \left( \frac{cs}{2^{\log_2 s - 2}} + c \right) \frac{cs}{2^{\log_2 s - 2}} \right]^{1/2} \quad (154)$$

$$= \left[ a_s \left( \frac{a_s}{2} + c \right) \frac{a_s}{2} \left( \frac{a_s}{4} + c \right) \frac{a_s}{4} \left( \frac{a_s}{8} + c \right) \frac{a_s}{8} \times \cdots \times \left( \frac{a_s}{2^{\log_2 s - 2}} + c \right) \frac{a_s}{2^{\log_2 s - 2}} \right]^{1/2}. \quad (155)$$

In (155) we substitute  $a_s$  for  $cs$ . Next we factor  $a_s$  out in all the brackets to have the following.

$$\left[ a_s a_s \left( \frac{1}{2} + \frac{c}{a_s} \right) a_s \left( \frac{1}{2} \right) a_s \left( \frac{1}{4} + \frac{c}{a_s} \right) a_s \left( \frac{1}{4} \right) a_s \left( \frac{1}{8} + \frac{c}{a_s} \right) a_s \left( \frac{1}{8} \right) \times \right. \\ \left. \cdots \times a_s \left( \frac{1}{2^{\log_2 s - 2}} + \frac{c}{a_s} \right) a_s \left( \frac{1}{2^{\log_2 s - 2}} \right) \right]^{1/2}. \quad (156)$$

In total we have twice  $(\log_2 s - 2)$  plus 1 factors of  $a_s$ . We use this and the fact that  $c/a_s = 1/s$  to simplify (156) to (157), which further simplifies to (158) by rearranging the terms in (157).

$$\left[ (a_s)^{2\log_2 s - 3} \left( \frac{1}{2} + \frac{1}{s} \right) \left( \frac{1}{2} \right) \left( \frac{1}{4} + \frac{1}{s} \right) \left( \frac{1}{4} \right) \left( \frac{1}{8} + \frac{1}{s} \right) \left( \frac{1}{8} \right) \times \right. \\ \left. \cdots \times \left( \frac{1}{2^{\log_2 s - 2}} + \frac{1}{s} \right) \left( \frac{1}{2^{\log_2 s - 2}} \right) \right]^{1/2}. \quad (157)$$

$$\left[ (a_s)^{2\log_2 s - 3} \left( \frac{1}{2} \cdot \frac{1}{2^2} \cdot \frac{1}{2^3} \cdots \frac{1}{2^{\log_2 s - 2}} \right) \times \right. \\ \left. \cdots \times \left( \frac{1}{2} + \frac{1}{s} \right) \left( \frac{1}{2^2} + \frac{1}{s} \right) \left( \frac{1}{2^3} + \frac{1}{s} \right) \cdots \left( \frac{1}{2^{\log_2 s - 2}} + \frac{1}{s} \right) \right]^{1/2}. \quad (158)$$

We focus on bounding the second line of (158), ignoring the square-root for the moment, that is  $\left( \frac{1}{2} + \frac{1}{s} \right) \left( \frac{1}{2^2} + \frac{1}{s} \right) \left( \frac{1}{2^3} + \frac{1}{s} \right) \times \cdots \times \left( \frac{1}{2^{\log_2 s - 2}} + \frac{1}{s} \right)$ . This equals

$$\exp \left( \log \left[ \left( \frac{1}{2} + \frac{1}{s} \right) \left( \frac{1}{2^2} + \frac{1}{s} \right) \left( \frac{1}{2^3} + \frac{1}{s} \right) \cdots \left( \frac{1}{2^{\log_2 s - 2}} + \frac{1}{s} \right) \right] \right) \quad (159)$$

$$= \exp \left( \log \left[ \frac{1}{2} \left( 1 + \frac{2}{s} \right) \right] + \log \left[ \frac{1}{2^2} \left( 1 + \frac{2^2}{s} \right) \right] + \cdots + \log \left[ \frac{1}{2^{\log_2 s - 2}} \left( 1 + \frac{2^{\log_2 s - 2}}{s} \right) \right] \right) \quad (160)$$

$$= \exp \left( \log \left[ \frac{1}{2} \cdot \frac{1}{2^2} \cdot \frac{1}{2^3} \cdots \frac{1}{2^{\log_2 s - 2}} \right] + \log \left[ \left( 1 + \frac{2}{s} \right) \left( 1 + \frac{2^2}{s} \right) \cdots \left( 1 + \frac{2^{\log_2 s - 2}}{s} \right) \right] \right). \quad (161)$$

From (159) to (161), we used simple algebra involving logarithms. Upper bounding  $\log(1+x)$  by  $x$ , since  $\log(1+x) \leq x$  for  $|x| < 1$ , we upper bounded the exponent involving the second log term to upper bound (161) by the following.

$$\left(\frac{1}{2} \cdot \frac{1}{2^2} \cdot \frac{1}{2^3} \cdots \frac{1}{2^{\log_2 s-2}}\right) \times \exp\left(\frac{2}{s} + \frac{2^2}{s} + \frac{2^3}{s} + \cdots + \frac{2^{\log_2 s-2}}{s}\right) \quad (162)$$

$$= \left(\frac{1}{2} \cdot \frac{1}{2^2} \cdot \frac{1}{2^3} \cdots \frac{1}{2^{\log_2 s-2}}\right) \times \exp\left[\frac{1}{s} \left(\frac{s}{2} - 2\right)\right] \leq \left(\frac{1}{2} \cdot \frac{1}{2^2} \cdot \frac{1}{2^3} \cdots \frac{1}{2^{\log_2 s-2}}\right) e^{\frac{1}{2}}. \quad (163)$$

The exponent of the exponential on the right of (162) is a geometric series and this simplifies to the LHS bound of (163). The RHS bound of (163) is due to upper bounding  $e^{1/2-2/s}$  by  $e^{1/2}$ . Using the bound in (163), we upper bound (158) by the following.

$$\left[e^{\frac{1}{2}} \cdot (a_s)^{2 \log_2 s-3} \left(\frac{1}{2} \cdot \frac{1}{2^2} \cdot \frac{1}{2^3} \cdots \frac{1}{2^{\log_2 s-2}}\right)^2\right]^{1/2} = e^{\frac{1}{4}} \cdot (a_s)^{\log_2 s - \frac{3}{2}} \cdot \left[2^{-(1+2+\cdots+(\log_2 s-2))}\right] \quad (164)$$

$$= \frac{1}{2} e^{\frac{1}{4}} \cdot (a_s)^{\log_2 s - \frac{3}{2}} \cdot s^{\frac{1}{2} \log_2 s + \frac{3}{2}}, \quad (165)$$

which is the bound in (65), hence concluding the derivation as required.
